# Supplementary material for: Unravelling the potential of sustainable aviation fuels to decarbonise the aviation sector
Source: Royal Society of Chemistry journal article supplement (doi:10.1039/d1ee03437e), 2022-01-01
Supplement: d1ee03437e1.pdf [file d1ee03437e1.pdf]

# Electronic Supplementary Information. Unravelling the potential of Sustainable Aviation Fuels to decarbonise the aviation sector.

Andres Gonzalez-Garay,<sup>a</sup> Clara Heuberger-Austin,<sup>b</sup> Xiao Fu,<sup>b</sup> Mark Klokkenburg,<sup>b</sup>  
Di Zhang,<sup>a,c</sup> Alexander van der Made,<sup>\*b</sup> and Nilay Shah<sup>\*a</sup>

<sup>a</sup> The Sargent Centre for Process Systems Engineering,  
Imperial College London, SW7 2AZ, London, UK

<sup>b</sup> Shell Global Solutions International B.V., Shell Technology Centre Amsterdam,  
Royal Dutch Shell, 1031 HW Amsterdam, Netherlands

<sup>c</sup> Centre for Environmental Policy,  
Imperial College London, SW7 1NA, London, UK

\* E-mail: n.shah@imperial.ac.uk, alexander.vandermade@shell.com.

## A Radiation profiles

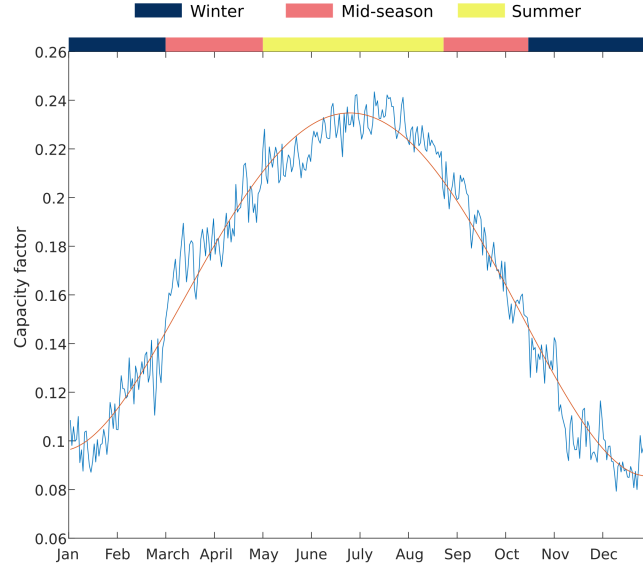

Figure A.1: Average annual capacity factor of solar radiation in Spain over the period 2010-2019 and seasons defined in the RTN model.

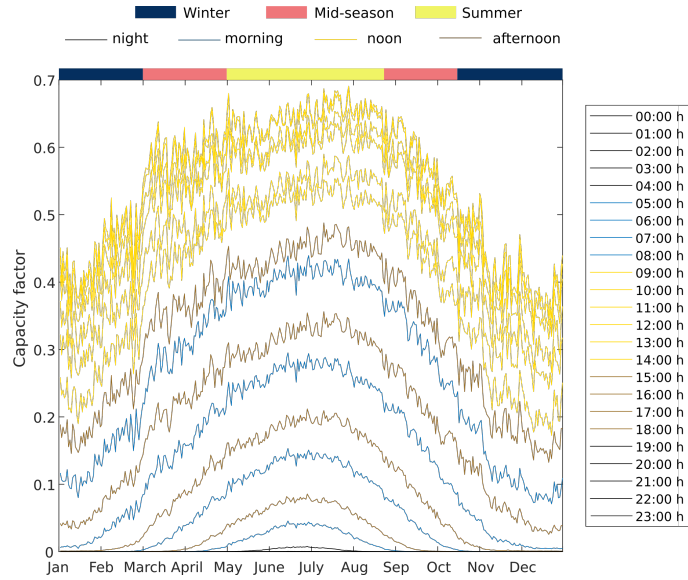

Figure A.2: Hourly capacity factors across the year over the period 2010-2019 and seasons defined in the RTN model.

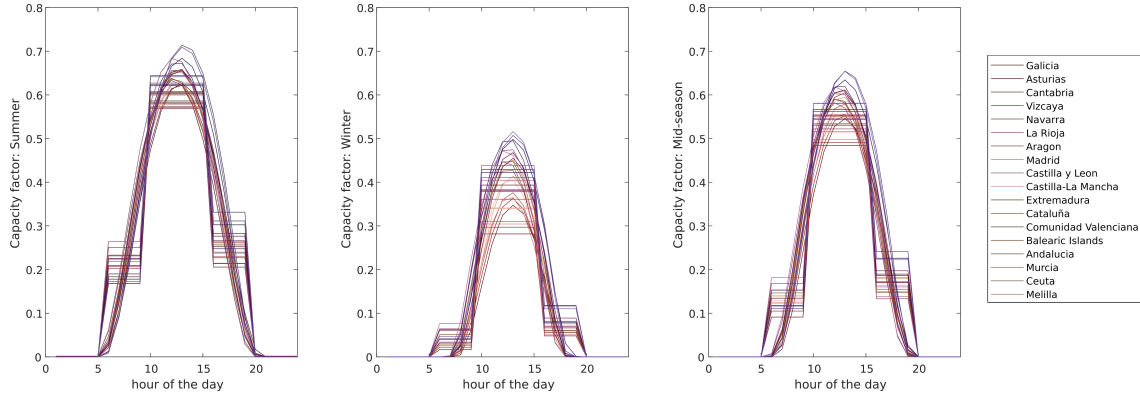

Figure A.3: Capacity factor profiles for the 18 NUTS regions of Spain and adjustment to the temporal resolution of the RTN model.

## B Demand profile

Fig. B.1 shows the annual number of operations per airport in Spain. Total demand of jet fuel was allocated to each airport according to the relative number of operations. For daily consumption, it was assumed that 85% of the demand was evenly fulfilled across the morning, noon, and afternoon periods while the remaining 15% was fulfilled during the night period.<sup>1,2</sup>

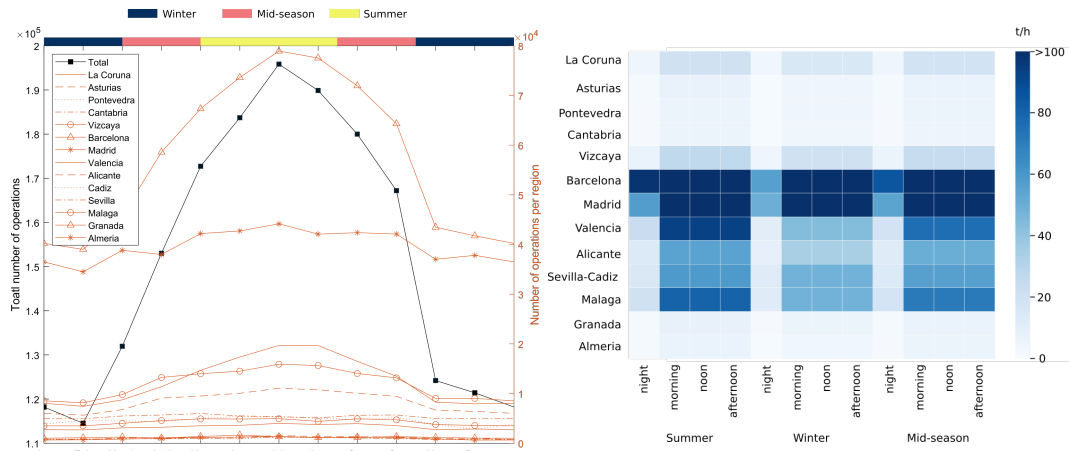

Figure B.1: Number of operations per airport in Spain included in the RTN model and profile of the RTN model.

## C Airports used to define the minimum regional demand of jet fuel

Table 1: Airports used to define the minimum regional demand of Jet Fuel in the RTN model. <sup>1,2</sup>

| Airport                      | Operations | Passengers | Status                      |
|------------------------------|------------|------------|-----------------------------|
| ADOLFO SUÁREZ MADRID-BARAJAS | 387,568    | 53,400,844 | Included                    |
| BARCELONA-EL PRAT            | 323,535    | 47,284,346 | Included                    |
| PALMA DE MALLORCA            | 208,788    | 27,970,656 | Included - Balearic Islands |
| MALAGA-COSTA DEL SOL         | 137,178    | 18,626,581 | Included                    |
| GRAN CANARIA                 | 118,551    | 13,092,475 | Excluded - Canary Islands   |
| ALICANTE-ELCHE               | 95,323     | 13,713,063 | Included                    |
| IBIZA                        | 75,691     | 7,903,928  | Included - Balearic Islands |
| TENERIFE SUR                 | 69,846     | 11,248,882 | Excluded - Canary Islands   |
| VALENCIA                     | 68,042     | 6,745,231  | Included                    |
| TENERIFE NORTE               | 61,102     | 4,706,827  | Excluded - Canary Islands   |
| LANZAROTE                    | 59,477     | 7,388,964  | Excluded - Canary Islands   |
| SEVILLA                      | 48,661     | 5,108,817  | Included                    |
| JEREZ DE LA FRONTERA         | 48,627     | 1,046,549  | Included                    |
| FUERTEVENTURA                | 48,216     | 6,049,291  | Excluded - Canary Islands   |
| BILBAO                       | 46,990     | 4,973,809  | Included                    |
| MADRID-CUATRO VIENTOS        | 46,568     | 3,341      | Included                    |
| SABADELL                     | 41,261     | 4,544      | Included                    |
| MENORCA                      | 30,293     | 3,434,615  | Included - Balearic Islands |
| SANTIAGO                     | 21,519     | 2,645,362  | Included                    |
| GIRONA                       | 19,254     | 1,946,694  | Included                    |
| LA PALMA                     | 17,757     | 1,302,485  | Excluded - Canary Islands   |
| A CORUÑA                     | 16,075     | 1,141,389  | Included                    |
| REUS                         | 16,023     | 1,018,889  | Included                    |
| ASTURIAS                     | 13,005     | 1,407,217  | Included                    |
| FGL GRANADA-JAEN             | 12,539     | 901,967    | Included                    |
| VIGO                         | 12,479     | 1,065,595  | Included                    |
| SON BONET                    | 12,258     | 2,159      | Excluded                    |
| ALMERIA                      | 12,219     | 1,007,446  | Included                    |
| SEVE BALLESTEROS-SANTANDER   | 10,989     | 937,643    | Included                    |
| SALAMANCA                    | 10,110     | 15,030     | Excluded                    |
| MURCIA-SAN JAVIER            | 8,616      | 1,196,587  | Included                    |
| VITORIA                      | 8,435      | 84,261     | Excluded                    |
| ZARAGOZA                     | 7,965      | 438,035    | Excluded                    |
| MELILLA                      | 7,957      | 324,366    | Excluded                    |
| HUESCA-PIRINEOS              | 7,758      | 257        | Excluded                    |
| CORDOBA                      | 7,756      | 8,064      | Excluded                    |
| SAN SEBASTIAN                | 6,925      | 281,859    | Excluded                    |
| PAMPLONA                     | 5,683      | 165,608    | Excluded                    |
| VALLADOLID                   | 5,100      | 227,259    | Excluded                    |
| EL HIERRO                    | 4,190      | 199,380    | Excluded - Canary Islands   |
| CEUTA /HELIPUERTO            | 2,521      | 17,821     | Excluded                    |
| BURGOS                       | 2,366      | 5,953      | Excluded                    |
| LEON                         | 2,236      | 44,254     | Excluded                    |
| BADAJOS                      | 1,865      | 49,304     | Excluded                    |
| LA GOMERA                    | 1,854      | 48,711     | Excluded - Canary Islands   |
| LOGROÑO                      | 1,447      | 20,008     | Excluded                    |
| ALGECIRAS /HELIPUERTO        | 1,376      | 10,570     | Excluded                    |
| ALBACETE                     | 430        | 1,380      | Excluded                    |



## D Accounting of CO<sub>2</sub> emissions

Fig. D.1 shows a scheme for the accounting of CO<sub>2</sub> emissions in the RTN model.

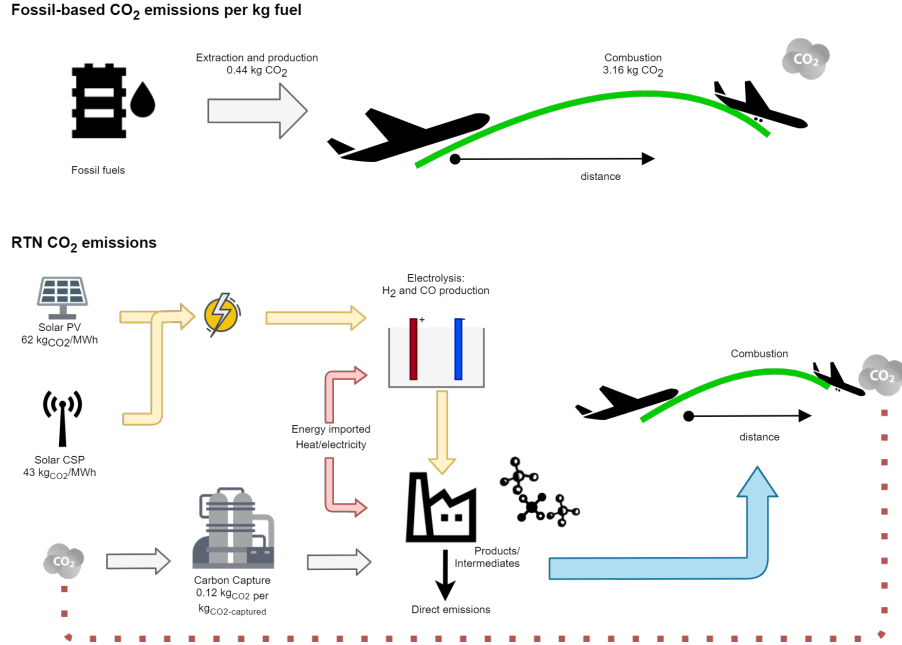

Figure D.1: Lifecycle CO<sub>2</sub> emissions considered in the production of jet fuel.

The values associated to the carbon intensity of solar panels were taken directly from the Ecoinvent database.<sup>3</sup> The infrastructure represents a photovoltaic power plant with a capacity of 570 kWp and a lifetime of 30 years. It consists of a multi-crystalline silicon panel, an open ground mounting structure, an 500 kW inverter (15 y lifetime) and a 570kWp electric installation. The process includes all the components for the installation and the energy used for mounting. Electricity production is 847.5 MWh per year and amortisation assumes an extrapolation of current generation capacities up to the end of life.<sup>4</sup> In the case of CSP, the plant considered in the database has a capacity of 50 MW and lifetime of 30 years. The elements considered include collector field area, thermal storage unit, heat transport fluid system and power block unit.<sup>5</sup>

## E Results

Table 2 presents the production costs and CO<sub>2</sub> emissions embedded for all the cases considered. As observed, the unitary production cost of the fuel and CO<sub>2</sub> emissions present a slight reduction as the demand increases. The reason behind this behaviour is that non-scalable technologies (solar PV, AWE, and storage technologies) have the larger contribution toward the indicators and their contributions remain at similar values across the scenarios. At larger production rates, scalable technologies benefit from economies of scale and reduce production costs by a slow margin.

Table 2: Technology constraints and performance indicators for different deployment level of Jet Fuel

|                                                      | FT   |      |      | MtF  |      |      |
|------------------------------------------------------|------|------|------|------|------|------|
|                                                      | 10%  | 50%  | 100% | 10%  | 50%  | 100% |
| Capacity constraints                                 |      |      |      |      |      |      |
| Solar PV (GWh per cell)                              | 2    | 10   | 20   | 2    | 10   | 20   |
| AWE (t/h per cell)                                   | 20   | 100  | 200  | 20   | 100  | 200  |
| Network performance                                  |      |      |      |      |      |      |
| Investment (€*10 <sup>9</sup> /y)                    | 4    | 209  | 417  | 5    | 260  | 520  |
| Prod. costs (€/kg <sub>fuel</sub> )                  | 5.03 | 4.97 | 4.95 | 3.97 | 3.91 | 3.91 |
| Emissions (Mt <sub>CO2eq</sub> /y)                   | 2    | 11   | 23   | 3    | 16   | 32   |
| Emissions (kg <sub>CO2eq</sub> /kg <sub>fuel</sub> ) | 2.7  | 2.7  | 2.7  | 2.4  | 2.4  | 2.4  |

## E.1 Fischer-Tropsch

Fig. E.1 shows the cost breakdown for the FT route for different demands and annual behaviour of the technologies deployed. Fig. E.2 displays the corresponding network for each scenario.

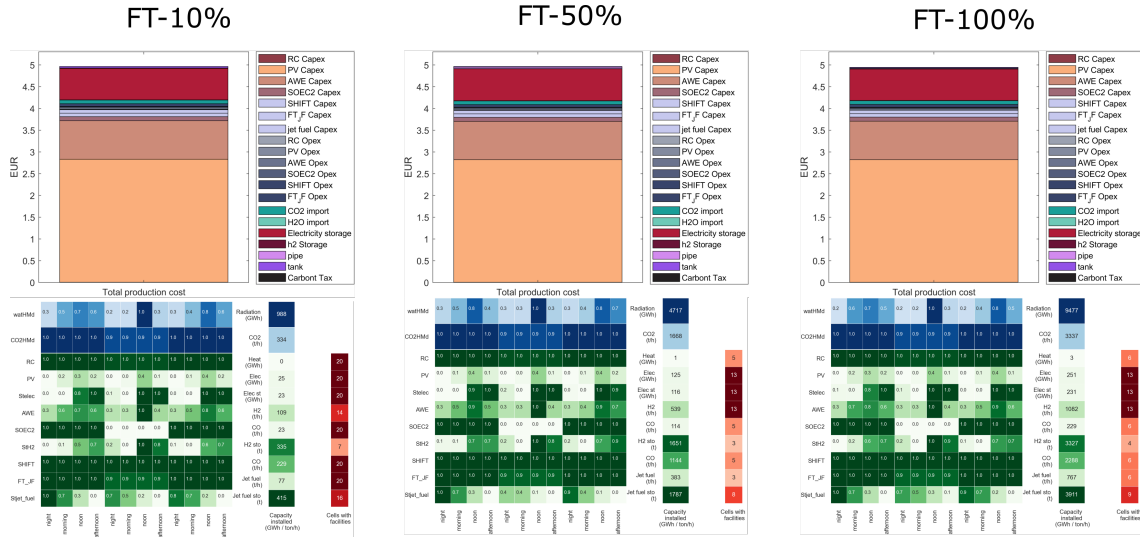

Figure E.1: Costs breakdown and technologies profile at different levels of supply of jet fuel demand for the FT route during the periods defined in the network. The resources (blue) and technologies (green) are shown in the left depicting the hourly behaviour at night, morning, noon, and afternoon for the three different seasons considered (summer, winter, and mid-season). The values shown in each square refer to the production rate in terms of the total capacity installed, which is reported in the middle bar. The red squares report the number of cells within the total space that have installed the corresponding technology.

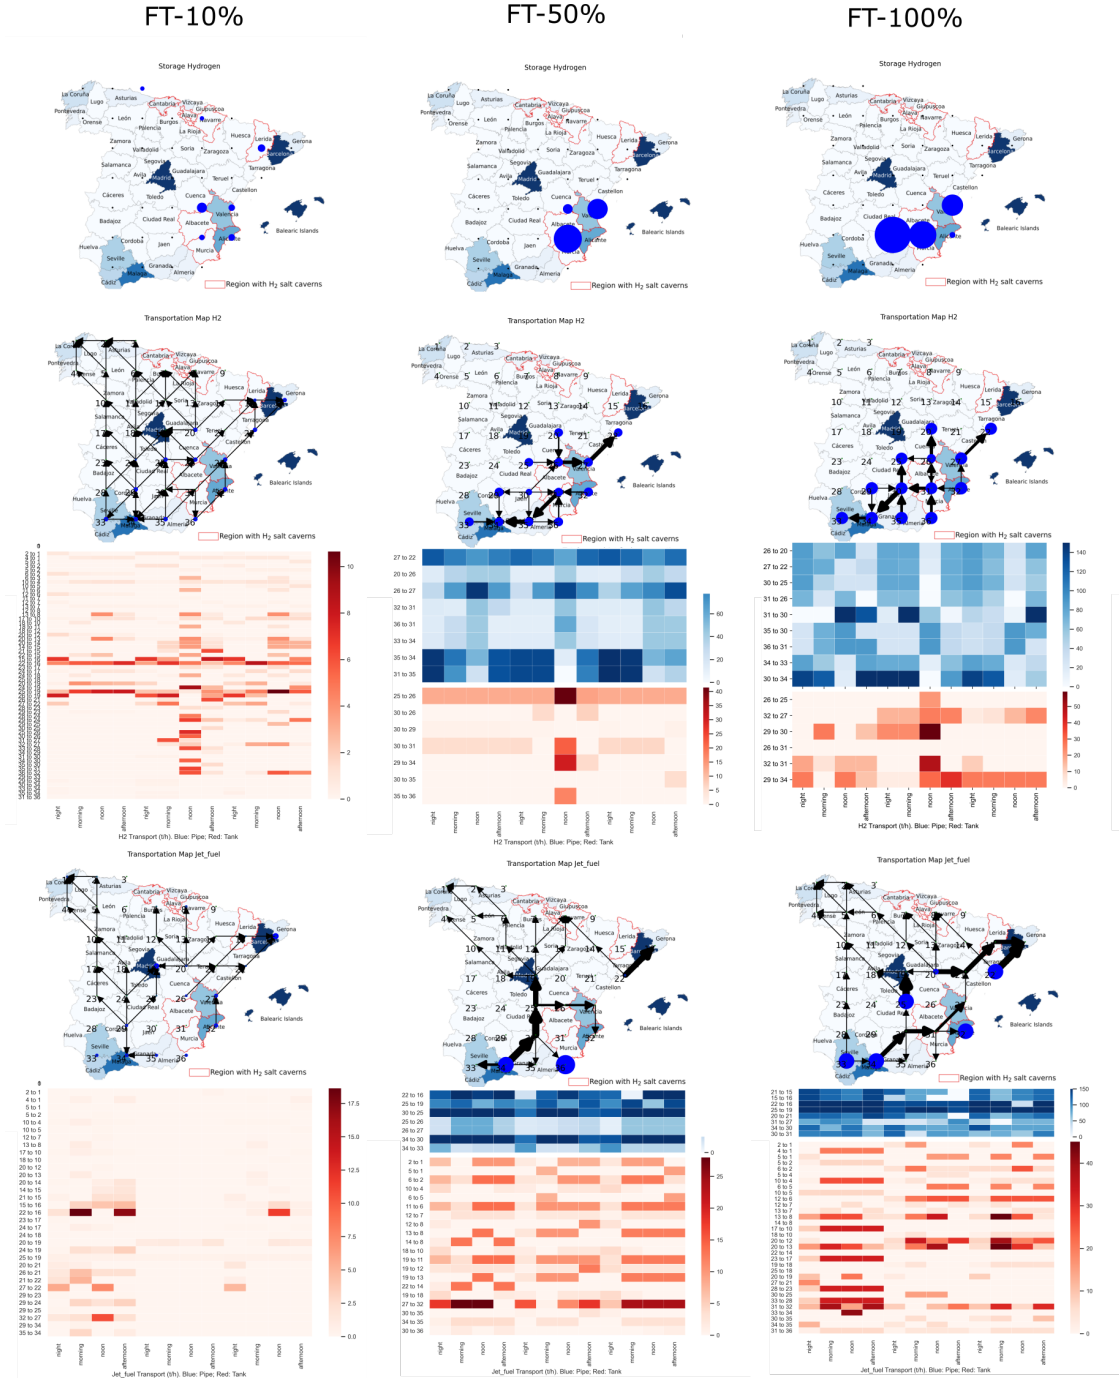

Figure E.2: Network performance at different levels of supply of jet fuel demand for the FT route.

## E.2 Methanol to fuels

Fig. E.3 shows the cost breakdown for the MtF route for different demands and annual behaviour of the technologies deployed. Fig. E.4 and E.5 display the corresponding network for each scenario.

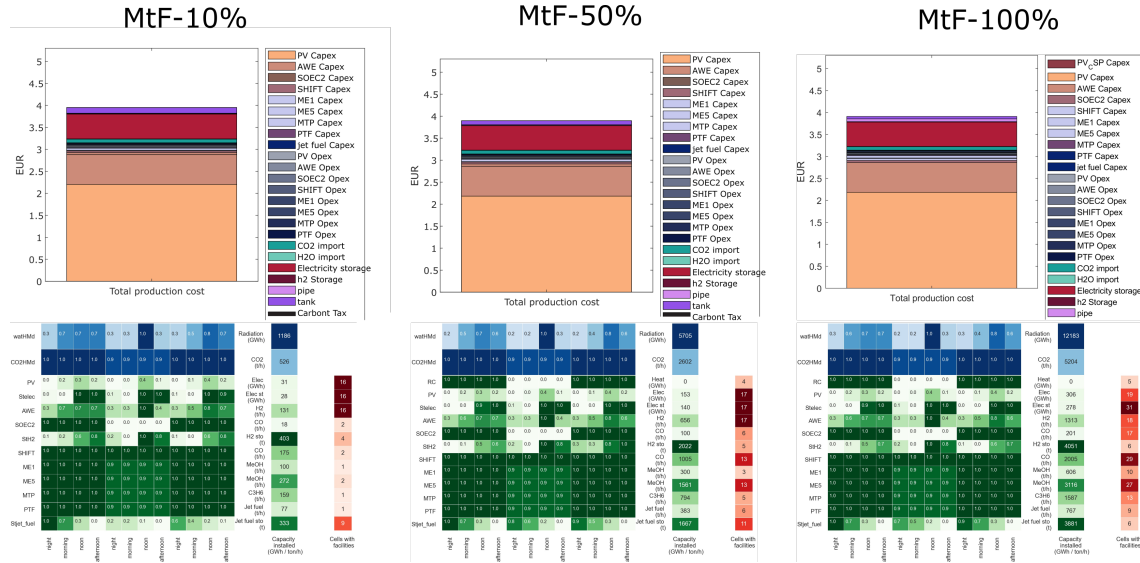

Figure E.3: Costs breakdown and technologies profile at different levels of supply of jet fuel demand for the FT route during the periods defined in the network. The resources (blue) and technologies (green) are shown in the left depicting the hourly behaviour at night, morning, noon, and afternoon for the three different seasons considered (summer, winter, and mid-season). The values shown in each square refer to the production rate in terms of the total capacity installed, which is reported in the middle bar. The red squares report the number of cells within the total space that have installed the corresponding technology.

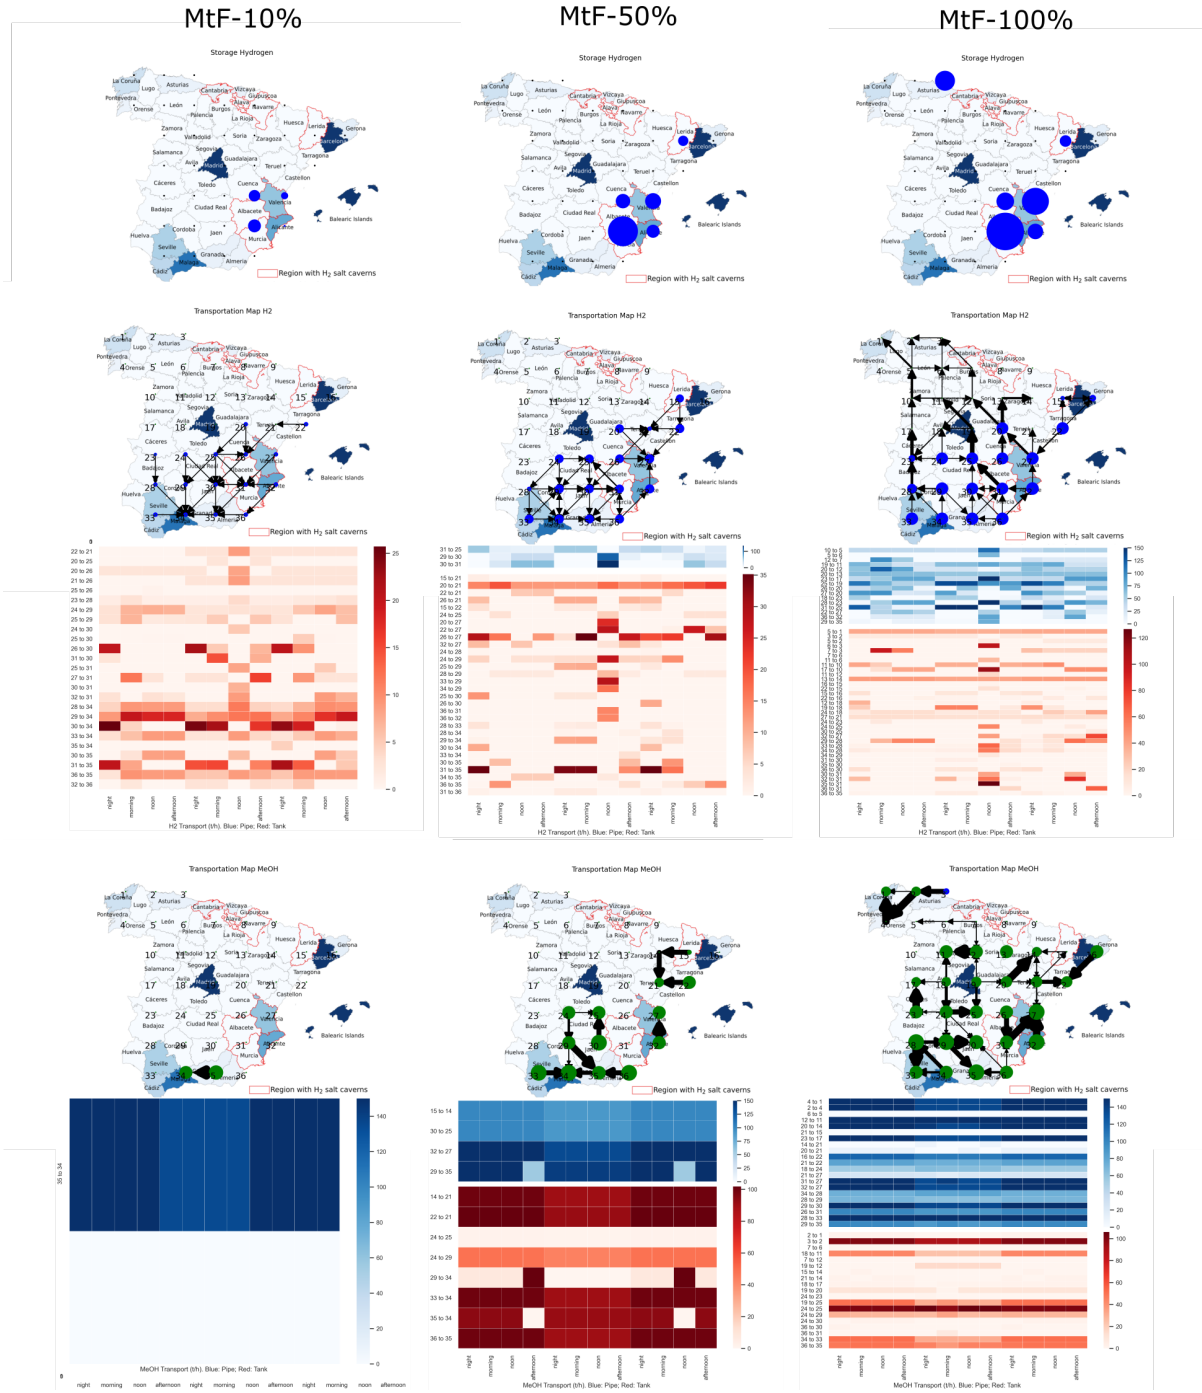

Figure E.4: Network performance at different levels of supply of jet fuel demand for the MtF route.

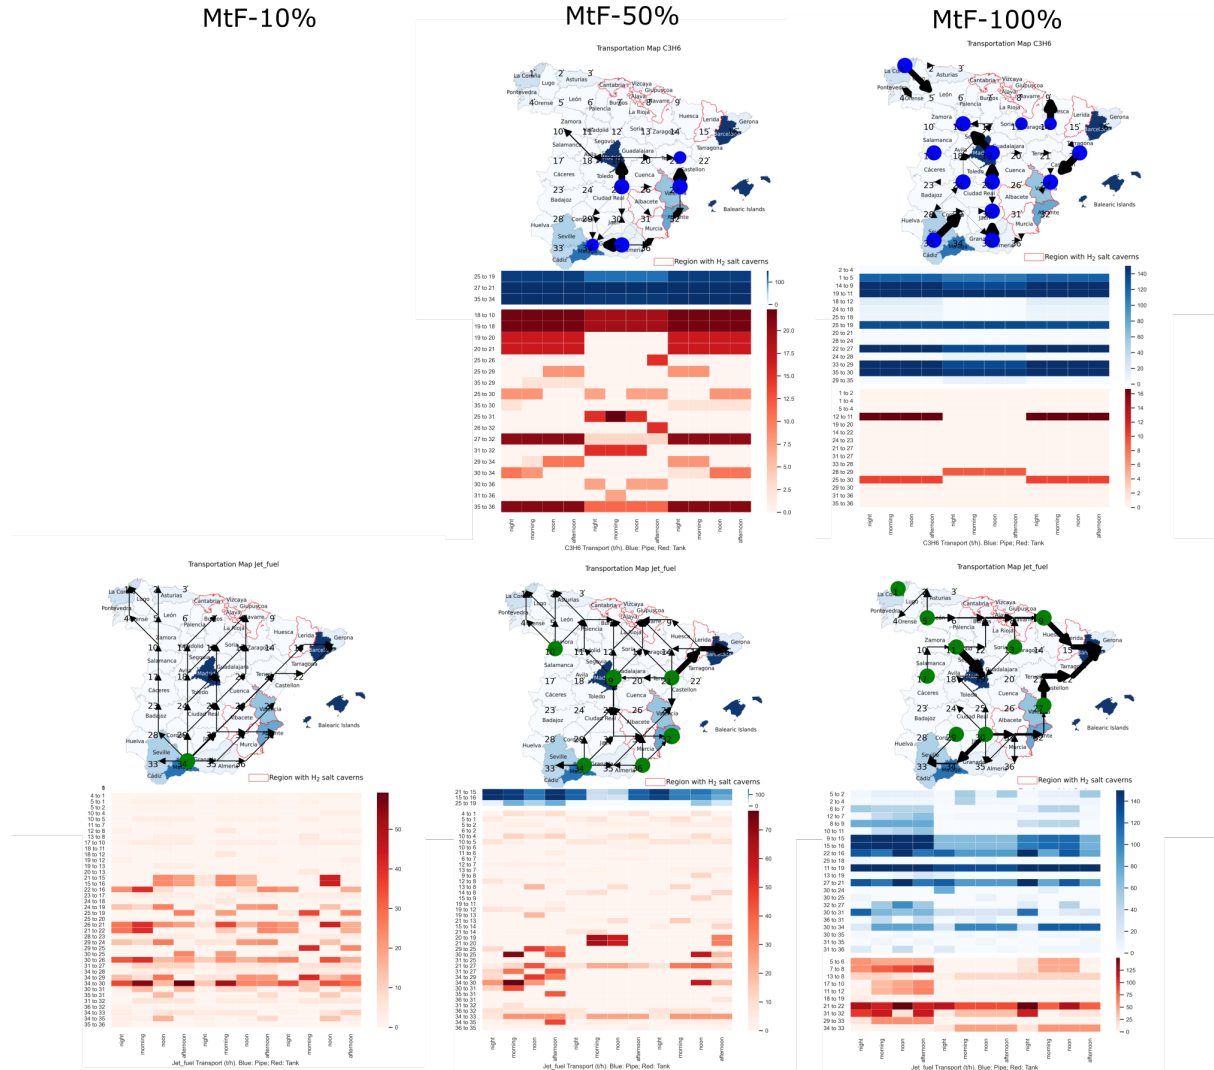

Figure E.5: Network performance at different levels of supply of jet fuel demand for the MtF route (cont.).

## F Energy import scenarios

### F.1 Fischer-Tropsch

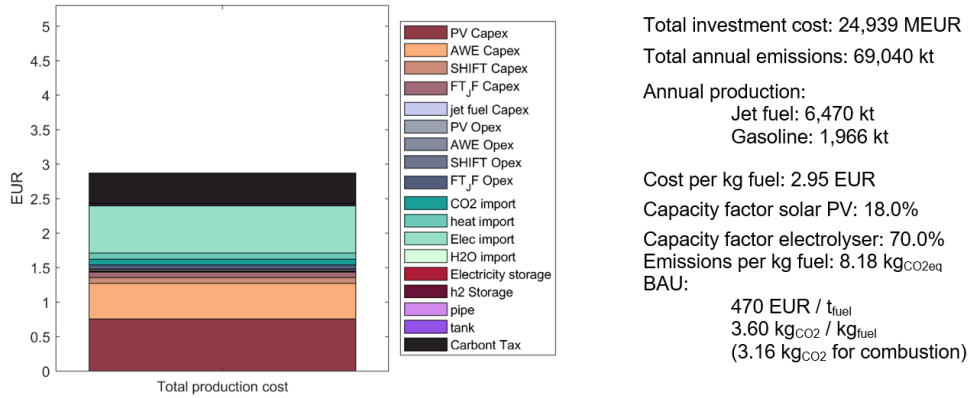

Figure F.1: Annual investment breakdown to produce jet fuel via Fischer-Tropsch including carbon tax and allowing electricity import from the grid and heat from natural gas.

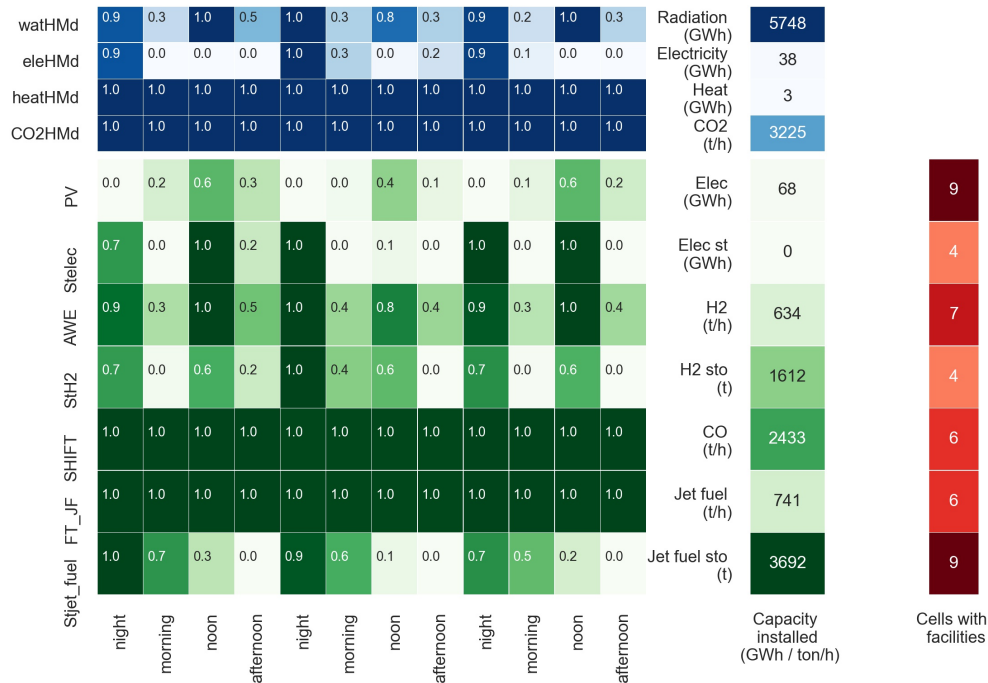

Figure F.2: Annual network performance to produce jet fuel via Fischer-Tropsch with import of electricity from the grid, heat from natural gas, and a carbon tax.



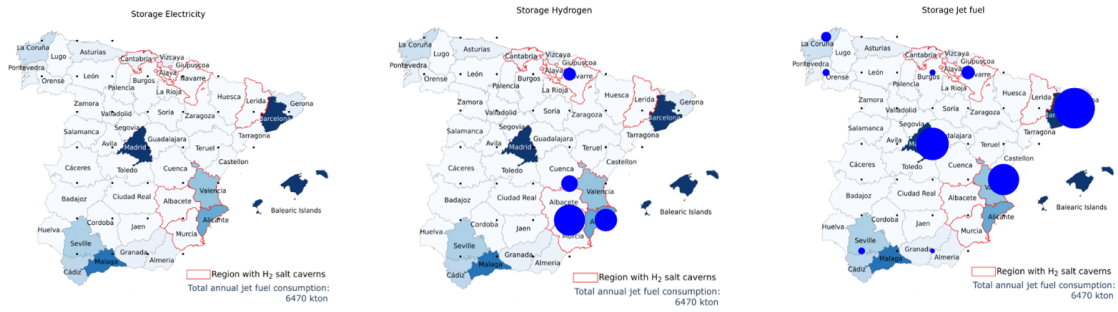

Figure F.3: Location of storage facilities in the FT route allowing external electricity and heat.

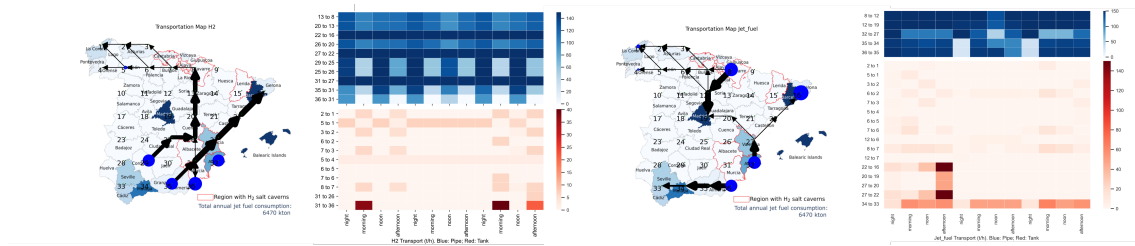

Figure F.4: Transportation map of resources in the FT route allowing external heat and electricity. Blue: Pipe transport; Red: Truck transport.

## F.2 Methanol to fuels

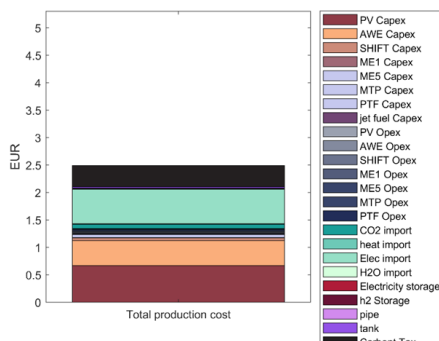

Annual production:

Jet fuel: 6,470 kt  
Gasoline: 6,837 kt

Cost per kg fuel: 2.57 EUR

Emissions per kg fuel: 7.17 kg<sub>CO2eq</sub>

Capacity factor solar PV: 17.9%

Capacity factor electrolyser: 70.1%

BAU:

470 EUR / t<sub>fuel</sub>  
3.60 kg<sub>CO2eq</sub> / kg<sub>fuel</sub>  
(3.16 kg<sub>CO2eq</sub> for combustion)

Figure F.5: Annual investment breakdown to produce jet fuel via MtF including carbon tax and allowing electricity import from the grid and heat from natural gas.

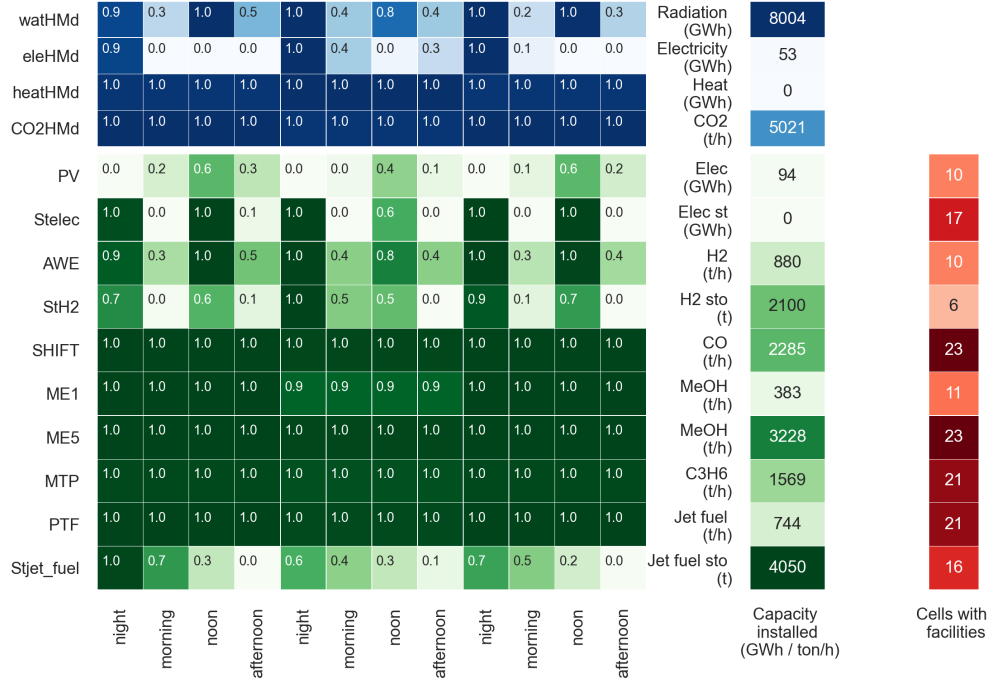

Figure F.6: Annual network performance to produce jet fuel via MtF with import of electricity from the grid, heat from natural gas, and a carbon tax.

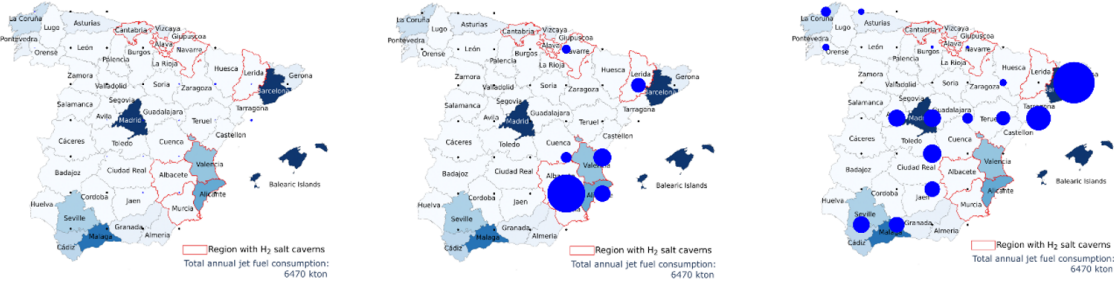

Figure F.7: Location of storage facilities in the MtF route allowing external electricity and heat.

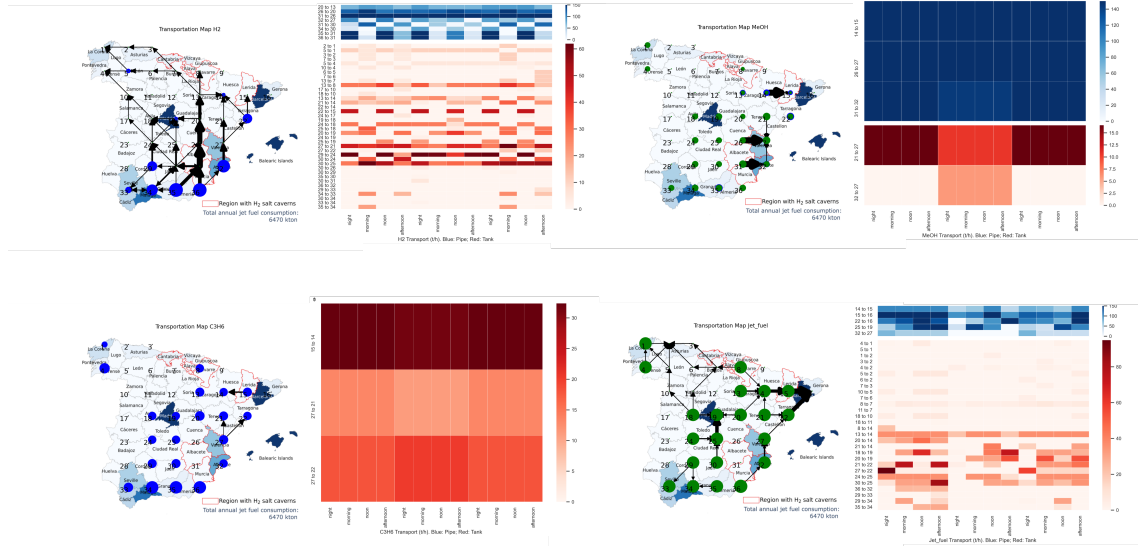

Figure F.8: Transportation map of resources in the MtF route allowing external heat and electricity. Blue: Pipe transport; Red: Truck transport.

### F.3 Importing energy constraining emissions

Electricity is assumed to have a cost of 80 €/MWh during the day and 30 €/MWh during the night, releasing 360 kg<sub>CO2eq</sub>/MWh. However, the cost of electricity and its emissions are expected to vary in the coming decades as the electricity mix decarbonises. According to the EU reference scenario 2016<sup>6</sup>, emissions from the energy sector are expected to decrease from 80 to 95% by 2050. In order to analyse the potential integration of the network with the electricity grid, we now modify the cost and CO<sub>2</sub> emissions of the electricity being imported according to Table 3<sup>7,8</sup>. The cost reported is assumed to be the ‘day’ cost while the ‘night’ cost is reduced by 63%, as in the previous scenarios. Here, we also consider the technological improvements in PV and AWE. As reported in the Jet Fuel Network section, the import of electricity results in fuels with a higher lifecycle carbon footprint than those obtained from oil refineries. Given that the main objective of the RTN model is to generate low-emissions fuels, in this sensitivity analysis we constrain the CO<sub>2</sub> emissions of the liquid fuel to be equal or lower to those of the oil-based

scenario ( $3.60 \text{ kg}_{\text{CO}_2\text{eq}}/\text{kg}_{\text{fuel}}$ ). Therefore, the main objective of the analysis is to identify the maximum amount of electricity that can be imported from the grid without resulting in a fuel with worst carbon footprint. The RTN model is optimised in terms of the total cost including a carbon tax of  $54 \text{ €/t}_{\text{CO}_2}$ . Heat import from natural gas is also allowed.

Table 3: Capital costs forecast for electricity, PV, CSP and AWE

| Year                                                             | 2015 | 2020 | 2030 | 2050 |
|------------------------------------------------------------------|------|------|------|------|
| PV cost (€/kWh)                                                  | 1300 | 810  | 684  | 360  |
| PV emissions ( $\text{kg}_{\text{CO}_2\text{eq}}/\text{kWh}$ )   | 67.8 | 62   | 44   | 8    |
| CSP cost (€/kWh)                                                 | 7027 | 5765 | 3915 | 2882 |
| CSP emissions ( $\text{kg}_{\text{CO}_2\text{eq}}/\text{kWh}$ )  | 46.7 | 42.7 | 36.8 | 25.0 |
| Elec cost (€/MWh)                                                | 80   | 100  | 100  | 100  |
| Elec emissions ( $\text{kg}_{\text{CO}_2\text{eq}}/\text{kWh}$ ) | 0.42 | 0.36 | 0.17 | 0.05 |
| AWE cost (€/kWh)                                                 | 1200 | 1000 | 750  | 500  |

Fig. F.9 shows the results for the production of jet fuel according to the cases presented in Table 3. Fig. F.9 a)-b), we present the production cost and emissions per kg of fuel along with the amount of electricity being imported from the grid. In Fig. F.9 c)-d), we show the installed capacities of PV, AWE, and storage of electricity and hydrogen. Both routes present again a similar behaviour. In the case of 2015, the production of 1 MWh of electricity via PV and accounting for electricity storage is  $285 \text{ €/MWh}$ , while that of electricity from the grid including the carbon tax is  $102 \text{ €}$  and  $53 \text{ €}$  for the day and night periods, respectively. In consequence, the model imports as much electricity as possible (4% in FT and 10% in MtF) until the limit of  $\text{CO}_2$  emissions is reached. By 2020, the cost per MWh of electricity from the network has reached  $86 \text{ €/MWh}$ , while that of electricity is now  $120$  and  $57 \text{ €/MWh}$  for the day and night periods. Since the electricity mix is still cheaper than the system PV-Storage, and its emissions are lower, a larger amount of electricity is imported (6% in FT and 15% in MtF). By 2030, electricity from the grid is still cheaper, allowing a further import as its emissions are expected to continue decreasing. The FT process shows an import of 28% reaching the 3.6

$\text{kg}_{\text{CO}_2\text{eq}}/\text{kg}_{\text{fuel}}$  and a cost of 2.85 €/kg<sub>fuel</sub>. In the MtF process, 53% of electricity is imported releasing 1.6 kg<sub>CO<sub>2</sub>eq</sub>/kg<sub>fuel</sub> at a cost of 1.71 €/kg<sub>fuel</sub>. Both routes show a reduction of installed capacities of PV, AWE around 20% while storage reduces by approximately 75%. Finally, by 2050, the technological improvements of PV and AWE allow for a further reduction in costs and CO<sub>2</sub> emissions while a maximum level of electricity import. In this scenario, the FT process reaches productions costs of 1.9 €/kg<sub>fuel</sub> and emissions of 2.14 kg<sub>CO<sub>2</sub>eq</sub>/kg<sub>fuel</sub> while the MtF process reaches 1.7 €/kg<sub>fuel</sub> and 1.59 kg<sub>CO<sub>2</sub>eq</sub>/kg<sub>fuel</sub>.

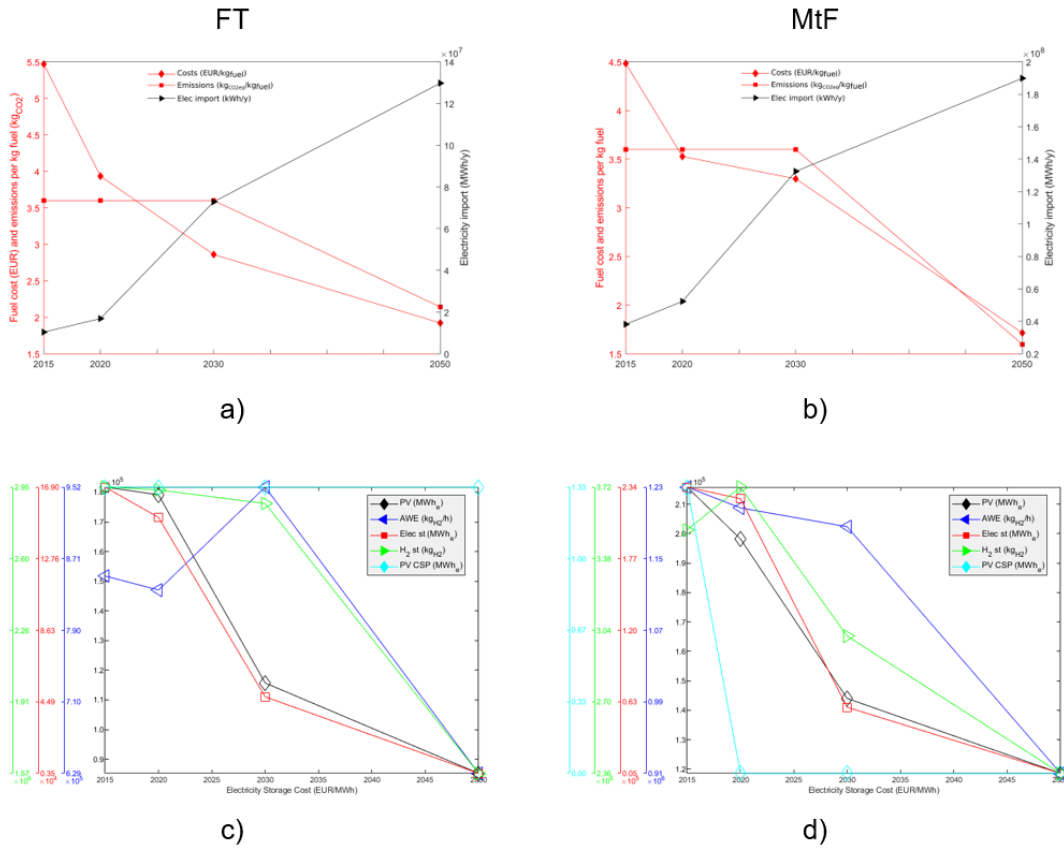

Figure F.9: Results for the sensitivity analysis over electricity price and CO<sub>2</sub> emissions for the production of jet fuel. a-b): total cost per ton of fuel (left axis) and electricity import allowed to maintain a maximum of 3.60 kg<sub>CO<sub>2</sub>eq</sub>/kg<sub>fuel</sub> (right axis). c-d): change in installed capacity of technologies in the network.

## G Sensitivity analysis

### G.1 Future costs of Solar electricity (PV and CSP) and AWE

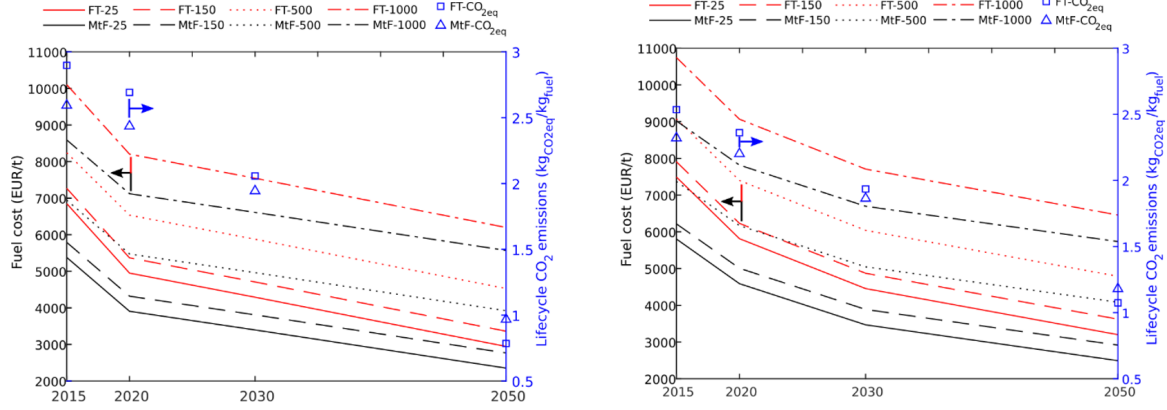

(a) Fuel cost and emissions according to forecast performance of PV and AWE. (b) Fuel cost and emissions according to forecast performance of CSP and AWE.

Figure G.1: Fuel cost and emissions according to forecast performance of PV, CSP and AWE.

### G.2 Varying minimum operating load of AWE

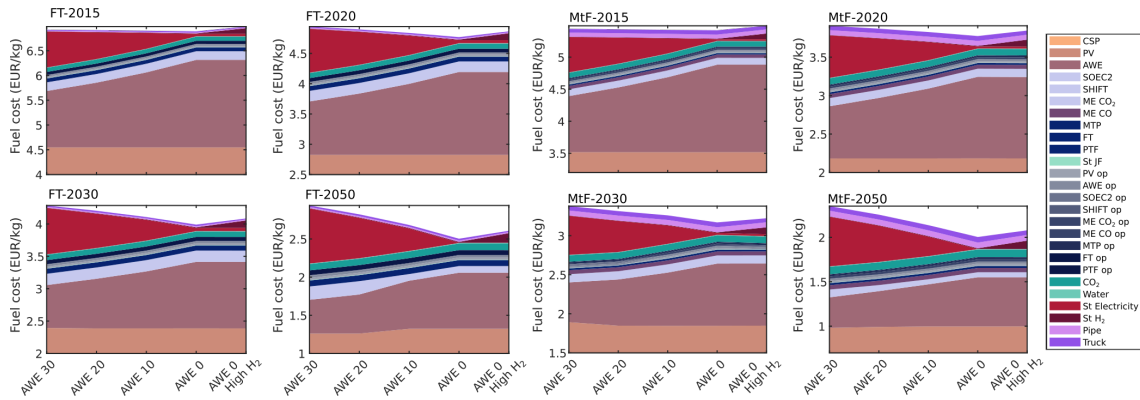

Figure G.2: Cost breakdown for the production of jet fuel at different minimum loads of AWE over time. Minimum AWE operating load: AWE 30: 30%, AWE 20: 20%, AWE 10: 10%, AWE 0: 0%, AWE 0 High H<sub>2</sub>: 0% and H<sub>2</sub> storage cost of 1200 €/kg<sub>H<sub>2</sub></sub>.

## H Sustainable aviation fuels

### H.1 Beyond solar Efuels

Table 4: Parameters used to calculate the cost and emissions of Sustainable Aviation Fuels

| Concept                                                                                    | 2020     | 2050      |
|--------------------------------------------------------------------------------------------|----------|-----------|
| Electrolyser (€/kW)                                                                        | 500-1200 | 400-1000  |
| Electricity consumption (kWh/kg <sub>H2</sub> )                                            |          | 50-85     |
| <i>Electricity cost</i>                                                                    |          |           |
| Solar PV (€/MWh)                                                                           | 60-200   | 10-50     |
| Wind (/euro/MWh)                                                                           | 45-120   | 20-70     |
| Capacity factor Solar PV                                                                   |          | 0.2       |
| Capacity factor Wind                                                                       |          | 0.5       |
| <i>Electricity CO<sub>2</sub> emissions</i>                                                |          |           |
| Solar PV (kgCO <sub>2eq</sub> /MWh)                                                        | 40-75    | 5-20      |
| Wind (kgCO <sub>2eq</sub> /MWh)                                                            | 8-20     | 4-8       |
| <i>Conventional jet fuel cost</i>                                                          |          | 0.43-0.75 |
| 2014 - 2019 (€/kg)                                                                         | 0.8      |           |
| BECCS costs of CO <sub>2</sub> avoided are reported in the range 15-250 €/tCO <sub>2</sub> |          |           |

### H.2 Air flight ticket concepts

According to Airlines for America,<sup>9</sup> ‘The vast majority of the Cost Index is derived from quarterly financial and operational information collected by DOT (principally Form 41 reports), and historical data may be restated as warranted. Neither the Cost Index nor its components are seasonally adjusted because 1) users may find seasonal fluctuations of great interest and 2) leaving the data unfettered allows users to impose adjustments of their own choosing. Consequently, quarter-to-quarter movements in certain indices may be driven in part by the seasonality of the variables used to compute them’.

Labour. Wages, employee benefits (e.g., annuity payments, educational, medical, recreational and retirement programs) and payroll taxes (e.g., FICA, state and federal unemployment insurance). General management, flight personnel, maintenance labour, and aircraft and traffic handling personnel are all included in the calculation of labour costs.

Table 5: Airlines for America U.S. Passenger Airline Cost Index (PACI): 4Q 2019.

| Concept                         | % OpEx |
|---------------------------------|--------|
| Fuel                            | 17.7   |
| Labour                          | 32.9   |
| Aircraft rent and ownership     | 6.7    |
| non-aircraft rent and ownership | 4.5    |
| Professional services           | 8.6    |
| Food and beverage               | 1.8    |
| Landing fees                    | 1.9    |
| Maintenance material            | 1.4    |
| Aircraft insurance              | 0.1    |
| non-aircraft insurance          | 0.2    |
| Passenger commission            | 0.8    |
| Communication                   | 0.8    |
| Advertising and promotion       | 0.7    |
| Utilities and office supplies   | 0.7    |
| Transport related               | 12.8   |
| Employee business               | 2.0    |
| Other                           | 6.5    |
| TOTAL                           | 100    |
| Airport taxes                   | +20%   |
| Profit                          | +15%   |

Fuel. Cost of aviation fuel used in flight operations, excluding taxes, transportation, storage and into-plane expenses.

Aircraft Rents and Ownership. The cost of aircraft rentals, depreciation and amortization of flight equipment, including airframes and parts, aircraft engine and parts, capital leases and other flight equipment. Non-Aircraft Rents Ownership. Principally, the total cost of airport terminal rents. Non-aircraft rents and ownership also includes the cost of hangars, ground service/support equipment (GSE), storage and distribution equipment, and communication and meteorological equipment.

Professional Services. The cost of legal fees and expenses (e.g., attorney fees, retainer fees, witness expenses, legal forms, litigation costs), professional and technical fees and expenses (e.g., engineering and appraisal fees, consultants, market and traffic surveys, laboratory costs),



as well as general services purchased outside (e.g., aircraft and general interchange service charges).

Food and Beverage. The cost of purchasing beverages and food, commissary supplies and outside catering charges. Landing Fees. The cost of fees paid by the airlines to airports for runway and airport maintenance.

Maintenance Material. The cost of maintaining and purchasing materials for airframes, aircraft engines, ground property and equipment (excluding labor costs). Also includes the costs of maintaining a shop and servicing supplies (e.g., automotive, electrical, plumbing, sheet metal, small tools, glass and glass products, cleaning compounds).

Aircraft Insurance. The cost of flight equipment insurance, sometimes referred to as hull insurance. Non-Aircraft Insurance. The cost of insurance unrelated to the hull itself. This category is broken down by two categories: general insurance (i.e., buildings and contents, materials and supplies, third party liability, passenger baggage and personal property) and traffic liability insurance (i.e., passenger baggage and personal property, cargo liability and provisions for self-insurance).

Passenger Commissions. The costs paid to passenger travel agencies for services.

Communication. The total cost of equipment and intercommunication rental and installation charges, telephone and teletype equipment, telegraph and cable message charges and navigation facility charges.

Advertising and Promotion. Includes the cost of producing tariffs, schedules, timetables and other promotional and publicity expenses (e.g., television, radio, entertainment, photography, graphics).

Utilities and Office Supplies. The cost of light, heat, power and water, stationary, printing (e.g., labels, small signs, ticket stock, paper products, company manuals), shipping and mailing supplies and other office supplies as well as cleaning compounds, safety, electrical, engineering,

drafting, blue prints and photographic supplies.

Transport-Related Expenses. As defined by DOT, transport-related expenses are expenses incurred for providing air transportation facilities associated with the performance of service which emanate from and are incidental to air transportation services performed by the carrier.

Employee Business Expenses. Includes expenses incurred for travel, lodging, meals, entertainment, membership fees/dues in professional or social clubs and associations. These expenses are incurred by officers, executives, directors, and other personnel.

Other Operating Expenses. Includes the cost of miscellaneous expenses such as outside flight equipment, excess of losses over insurance recoveries, interrupted trips expense, corporate and fiscal expenses, uncollectible accounts, clearance customs and duties.

Interest. The total interest paid on long term debt, capital and other interest expenses. Included in this worksheet is the cost associated with average book debt outstanding and estimated off-balance sheet debt.

## References

- [1] AENA, *Estadísticas - Aeropuertos Españoles - aena.es*, 2018, <http://www.aena.es/csee/Satellite?pagename=Estadisticas/Home>.
- [2] MITMA, *Boletín estadístico online - Información estadística - Ministerio de Fomento*, 2019, <http://www.fomento.gob.es/BE/?nivel=2{%&}orden=03000000https://apps.fomento.gob.es/BoletinOnline2/?nivel=2{%&}orden=36000000>.
- [3] G. Wernet, C. Bauer, B. Steubing, J. Reinhard, E. Moreno-Ruiz, B. B. Weidema, R. Zah and W. Org, *International Journal of Life Cycle Assessment*, 2016, **21**, 1218–1230.
- [4] N. Jungbluth and M. Stucki, *ESU-services Ltd.*, 2012, 250.

- [5] T. Telsnig, *PhD thesis*, Universität Stuttgart, 2015.
- [6] EU, *EU Reference Scenario 2016*, 2016, p. 27.
- [7] IRENA, 2020, 143.
- [8] M. Pehl, A. Arvesen, F. Humpenöder, A. Popp, E. G. Hertwich and G. Luderer, *Nature Energy*, 2017, **2**, 939–945.
- [9] Airlines for America, *A4A Quarterly Passenger Airline Cost Index: U.S. Passenger Airlines*, 2019.
